# Supplementary material for: In situ growth of epitaxial lead iodide films composed of hexagonal single crystals
Source: Royal Society of Chemistry journal article supplement (doi:10.1039/b510077a), 2005-01-01

This journal is © The Royal Society of Chemistry 2005  
Electronic supplementary information for Journal of Materials Chemistry

***In situ* growth of epitaxial lead iodide films composed of hexagonal single crystals**

Zhi Zheng,<sup>\*ab</sup> Airuo Liu,<sup>a</sup> Shumin Wang,<sup>a</sup> Yu Wang,<sup>b</sup> Zhaosheng Li,<sup>c</sup> Woon Ming Lau<sup>b</sup>  
and Lizhi Zhang<sup>\*d</sup>

<sup>a</sup>Institute of Advanced Materials, Xuchang University, Xuchang, 461000, China,

<sup>b</sup>Department of Physics, The Chinese University of Hong Kong, Shatin, N. T., China,

<sup>c</sup>Ecomaterials and Renewable Energy Research Center, Department of Physics, Nanjing  
University, Jiangsu, 210093, China

<sup>d</sup>Key Laboratory of Pesticide & Chemical Biology, Ministry of Education, College of  
Chemistry, Central China Normal University, Wuhan, 430079, China.

\*Address correspondence to these authors. E-mail: [zhengzhi9999@yahoo.com.cn](mailto:zhengzhi9999@yahoo.com.cn),  
[zhanglz@mail.ccnu.edu.cn](mailto:zhanglz@mail.ccnu.edu.cn)

**Figure S1.** XPS I 3d, Pb 4f core level spectra and survey spectrum of  $\text{PbI}_2$  crystals/films generated from  $\text{I}_2$ /ethanol system with the iodine concentration of 0.007g/ml.

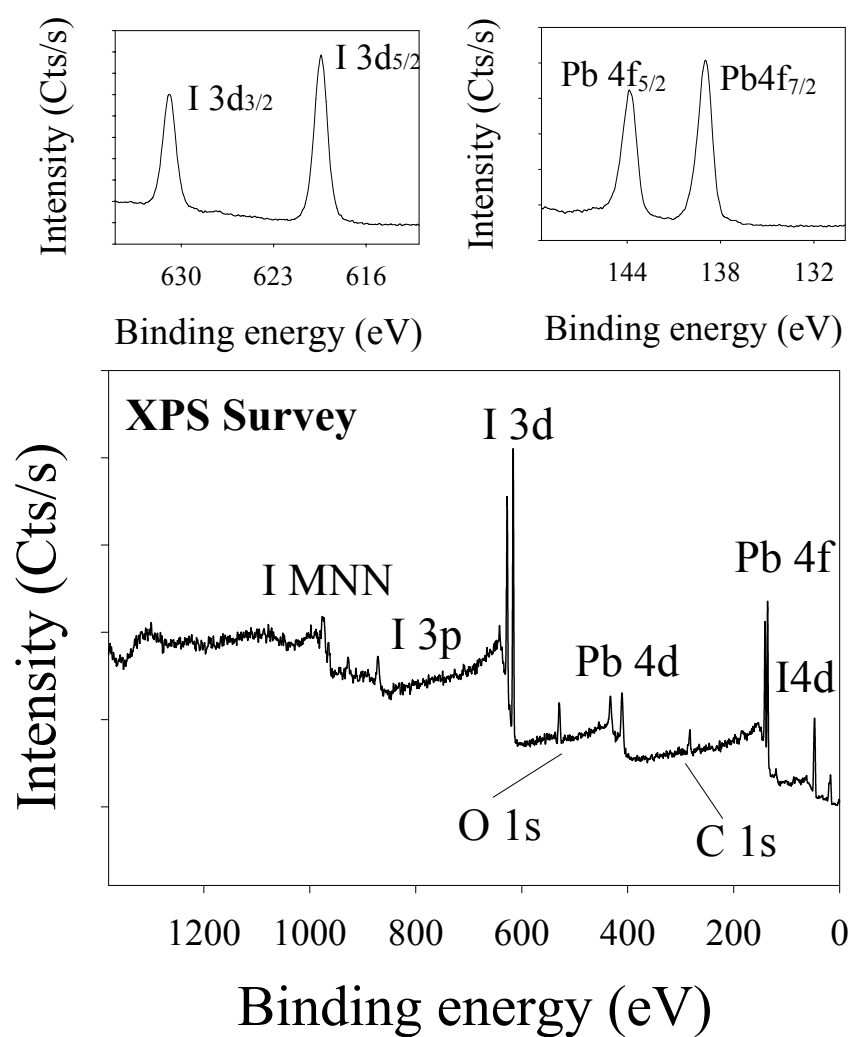

**Figure S2.** SEM images of lead iodide crystals grown on the lead foils with the iodine concentration of 0.014 g/ml in ethanol at 160 °C. Scale bar in a: 10  $\mu\text{m}$ , b: 100  $\mu\text{m}$ .

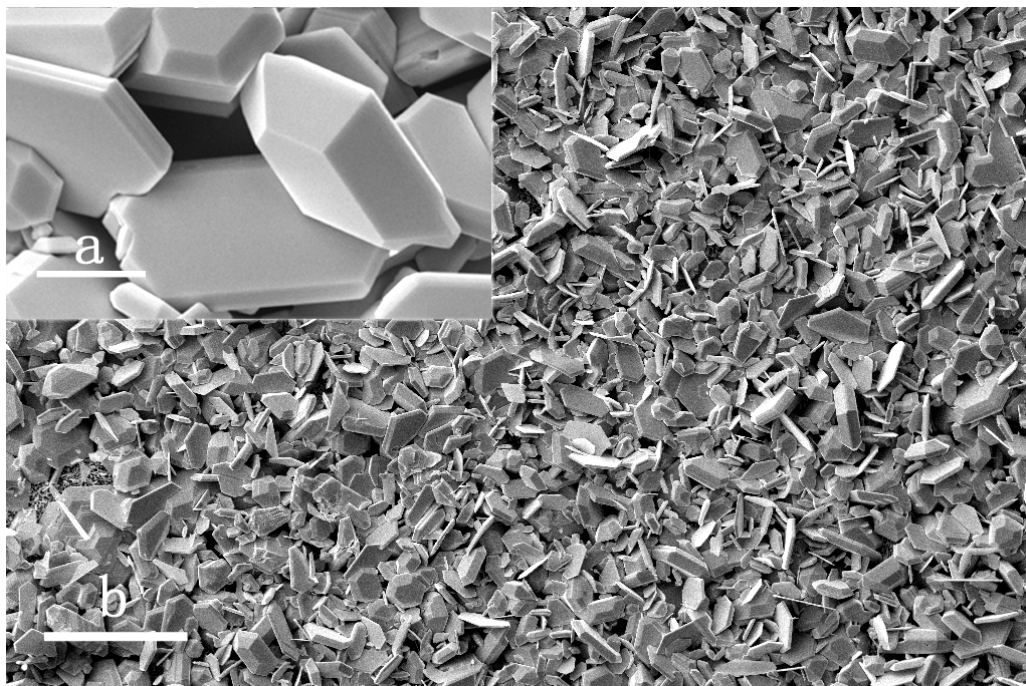

**Figure S3.** The representative XRD pattern of copper (I) iodide (CuI) crystals in-situ generated on the copper foils from I<sub>2</sub>/ethanol system with the iodine concentration of 0.007g/ml at 160 °C.

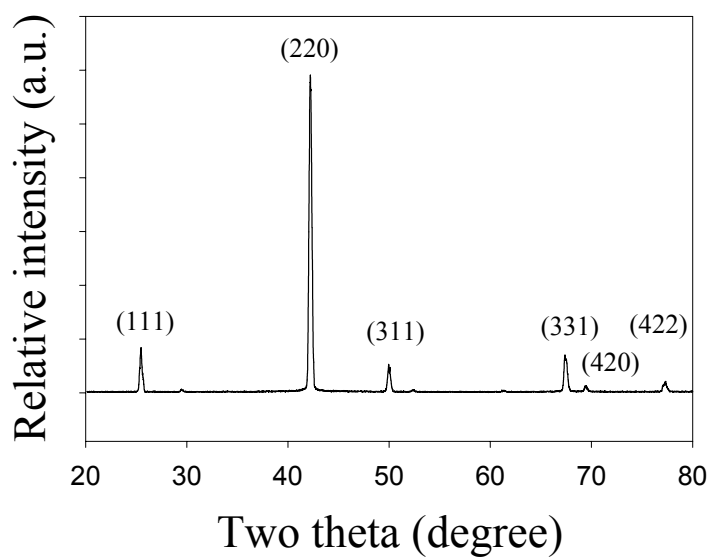

**Figure S4.** SEM images of copper (I) iodide (CuI) crystals in-situ grown on the copper foils in I<sub>2</sub>/ethanol system with the iodine concentration of 0.007 g/ml at 160 °C. Scale bar in b: 40 μm, c (enlarged image of b): 4 μm, top (a): corresponding EDX spectrum recorded from an individual cubic-like CuI crystal.

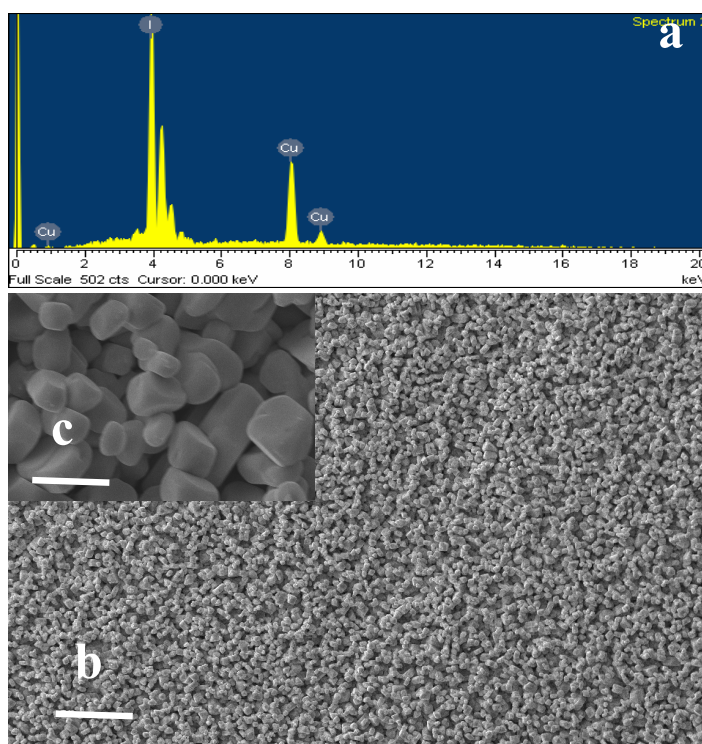

**Figure S5.** SEM image of porous  $\text{Pb}_4\text{O}_4\text{I}_{3.6}$  crystals in-situ grown on the lead foils in  $\text{I}_2/0.1\text{M NaOH}$  system with the iodine concentration of 0.014 g/ml at 160 °C.

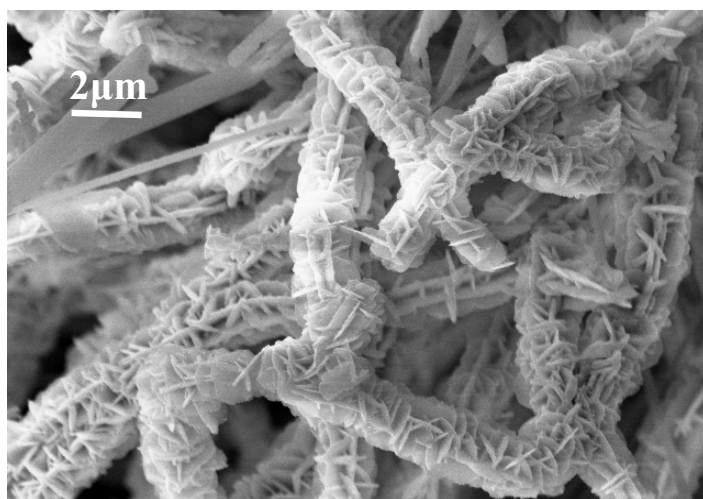

Supplement: b510077a.pdf [file b510077a.pdf]
